# Supplementary material for: Benzothiazole-Derived Covalent Organic Framework for Multimedia Iodine Uptake
Source: Research Square preprint supplement (doi:10.21203/rs.3.rs-3100667/v1), 2023-06-30
Supplement: Supplementary file 1 [file b063bc00c8c09e13b4289a15.docx]

**Supporting Information**

**Benzothiazole-Derived Covalent Organic Framework for Multimedia Iodine Uptake**

Ritika Jaryal1, Sadhika Khullar1*, Rakesh Kumar1*

1Dr. B. R. Ambedkar National Institute of Technology Jalandhar, Jalandhar, Punjab, India (144027)

*Corresponding author emails:* [**khullars@nitj.ac.in*](mailto:*khullars@nitj.ac.in)*, *rakeshkumar@nitj.ac.in*

**Contents Page Number**

**1. 1H NMR spectra of the monomers**

Fig. S1-S-3 1H NMR spectraof the synthesized monomers S3-S4

**2. Schematic for the synthesis of COFs** S4

**3. Characterization of the synthesized COFs**

13C CP-MAS solid-state NMR spectra of COFs S5

HR-TEM images of COFs S6

TGA scans of COFs S6

XPS spectra of COFs S7

1. **1H NMR spectra of the monomers**


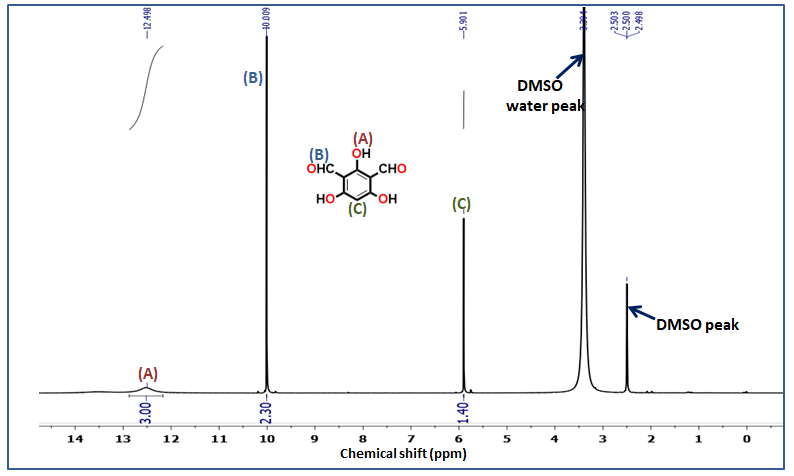


**Fig. S1.** 1H NMR spectrum of 2,4,-diformylphloroglucinol.


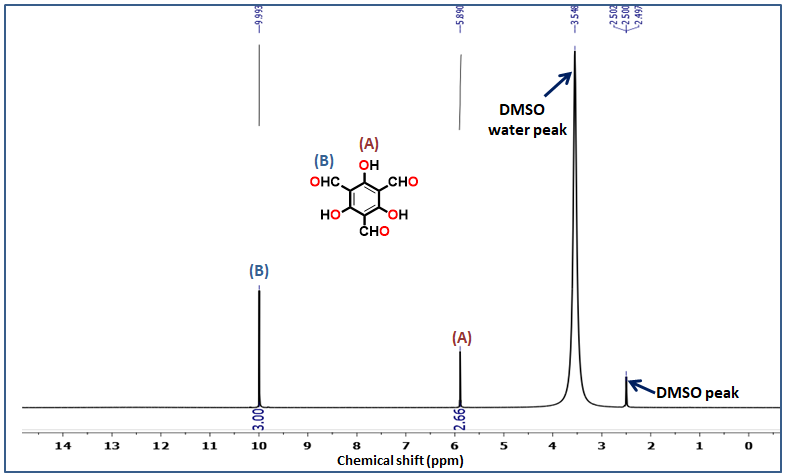


**Fig. S2.** 1H NMR spectrum of 2,4,6-triformylphloroglucinol.


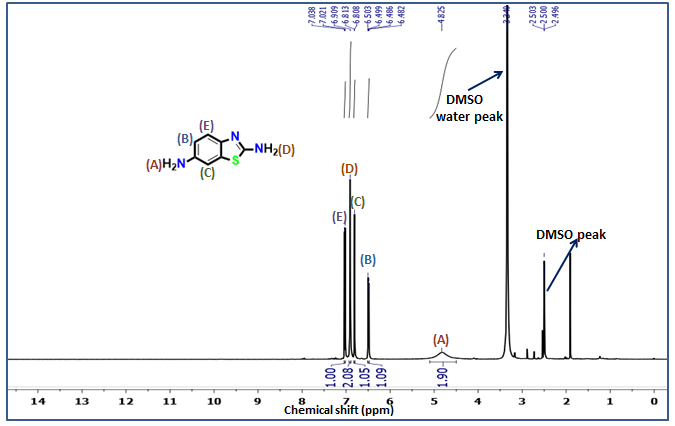


**Fig. S3.** 1H NMR spectrum of 2,6-diaminobenzothiazole.

1. **Synthetic for the synthesis of COFs**


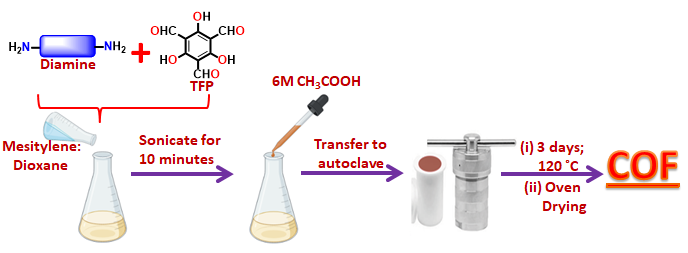


**Scheme S1.** Schematic representation for the synthesis of COF-3 and COF-4.

1. **Characterization of synthesized COFs**


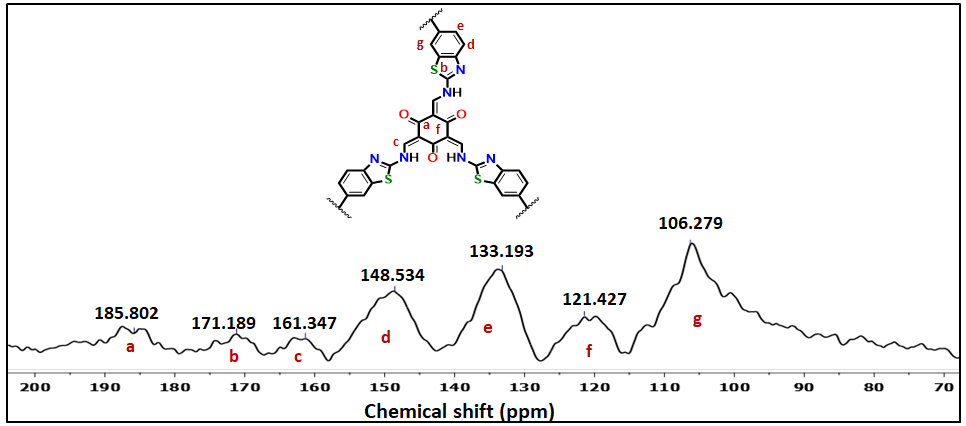


**Fig. S4.** 13C CP-MAS solid-state NMR spectrum of COF-3.


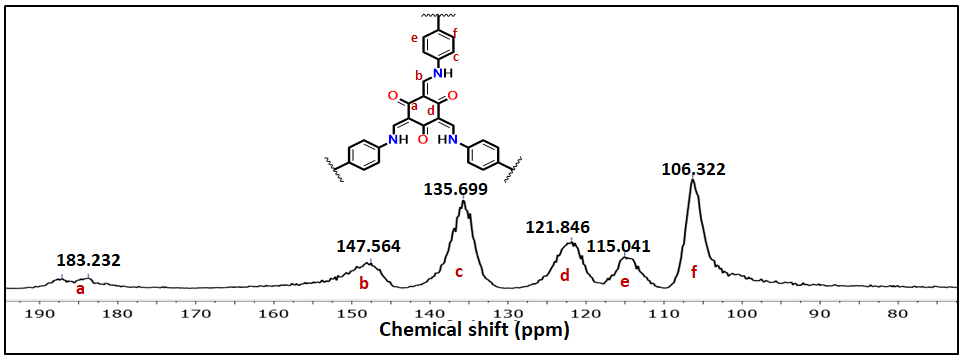


**Fig. S5.** 13C CP-MAS solid-state NMR spectrum of COF-4.


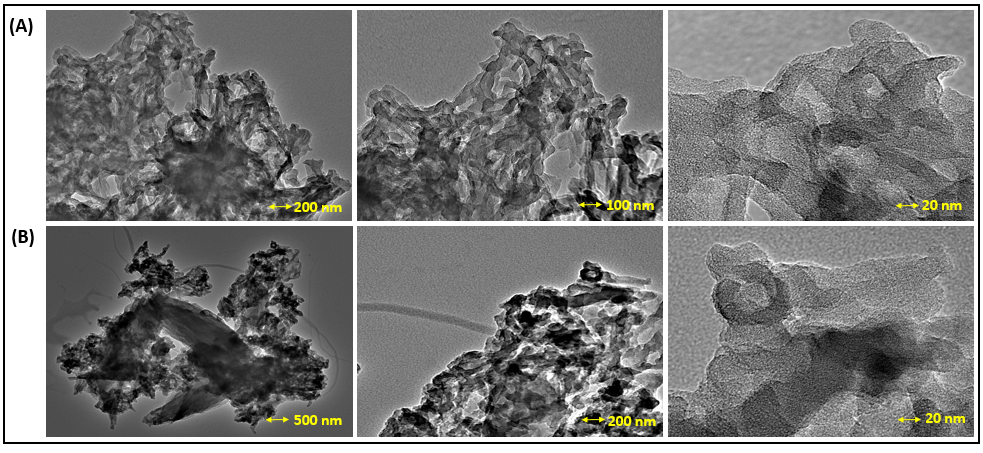


**Fig. S6.** HR-TEM images of COF-3 (A); and COF-4 (B).


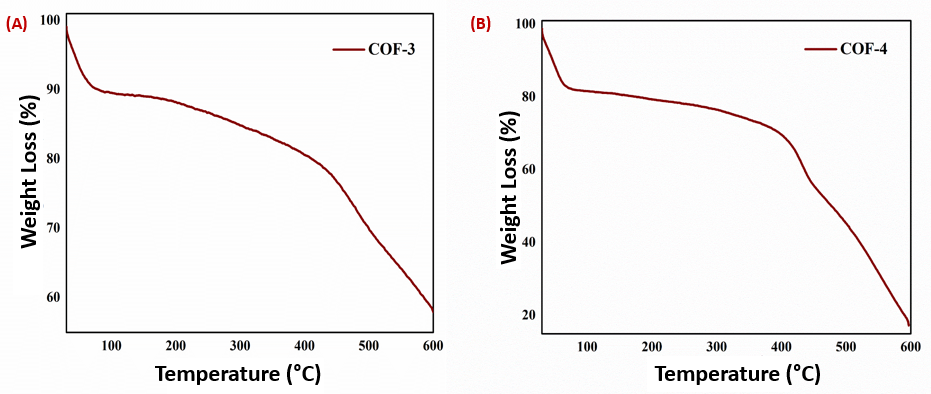


**Fig. S7.** TGA scans of COF-3 (A); and COF-4 (B).


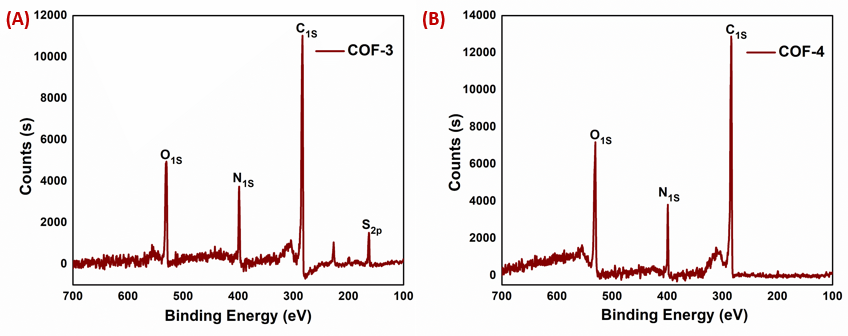


**Fig. S8.** XPS spectra of COF-3 (A); and COF-4 (B).
